# Supplementary material for: Temperature and magnetic dual responsive restricted access material for the extraction of malachite green from crucian and shrimp samples
Source: Royal Society of Chemistry journal article supplement (doi:10.1039/d0nj00230e), 2020-01-01
Supplement: d0nj00230e1.pdf [file d0nj00230e1.pdf]

## Supporting Information for

### Temperature and Magnetic Dual Responsive Restricted Access Material for Extraction of Malachite Green from Crucian and Shrimp Samples

Yuanyuan Li <sup>a,b\*</sup>, Xiangzhi Feng <sup>a,b</sup>, Yulong Ma <sup>a,b</sup>, Tong Chen <sup>c</sup>, Wenxin  
Ji <sup>a,b</sup>, Xiaoxia Ma <sup>a,b</sup>, Yang chen <sup>d</sup>, Hong Xu <sup>e</sup>

<sup>a</sup> *State Key Laboratory of High-efficiency Coal Utilization and Green  
Chemical Engineering and* <sup>b</sup> *College of Chemistry and Chemical  
Engineering, Ningxia University, Yinchuan 750021, China*

<sup>c</sup> *Comprehensive Technology Centre, Zhenjiang Customs District P. R.  
of China, Zhenjiang, 212000, China*

<sup>d</sup> *Shanghe New Materials Company, Zhenjiang, 212000, China*

<sup>e</sup> *Zhenjiang Centre for Disease Control and Prevention, Zhenjiang  
212000, China*

---

\* Corresponding author. Tel.: +86 951 2062330; fax: +86 951 2062323.  
E-mail address: liyuanyuan\_abc@sohu.com (Y. Li)

**Table S1: The Absorbance of standards malachite green at the concentration of 0.1-35  $\mu\text{g}\cdot\text{mL}^{-1}$**

| Concentration<br>( $\mu\text{g}/\text{mL}$ ) | 0.1   | 5     | 10    | 15    | 20    | 25    | 30    | 35    |
|----------------------------------------------|-------|-------|-------|-------|-------|-------|-------|-------|
| Absorbance<br>(A)                            | 0.026 | 0.769 | 1.722 | 2.675 | 3.745 | 4.669 | 5.722 | 6.496 |

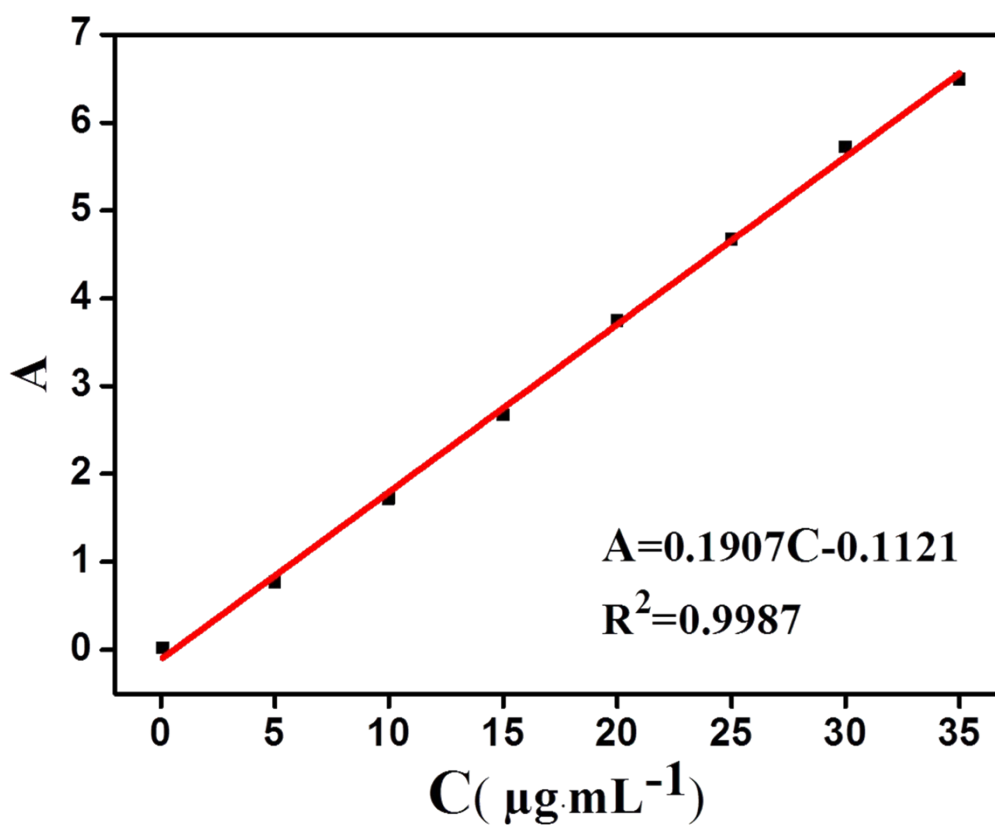

**Fig. S1 : Standard working curve of Malachite green**

**Table S2: Specification of Malachite green**

| <b>Contaminants</b>               | <b>Malachite green</b>                                                                                                                                                                                                                                                                                                                                                                                                                                                                                           |
|-----------------------------------|------------------------------------------------------------------------------------------------------------------------------------------------------------------------------------------------------------------------------------------------------------------------------------------------------------------------------------------------------------------------------------------------------------------------------------------------------------------------------------------------------------------|
| <b>Structure</b>                  | 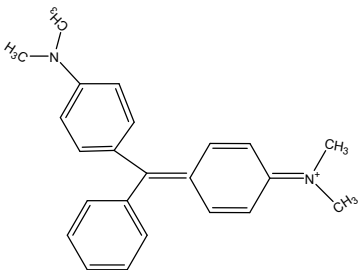 <p>The chemical structure of Malachite green is shown. It consists of a central carbon atom double-bonded to a nitrogen atom. The nitrogen atom is bonded to two methyl groups (CH<sub>3</sub>) and has a positive charge. The central carbon atom is also bonded to a phenyl ring and a para-substituted phenyl ring. The para-substituted phenyl ring has a methylamino group (-NHCH<sub>3</sub>) at the para position.</p> |
| <b>Molecular weight (g/mol)</b>   | <b>364.911</b>                                                                                                                                                                                                                                                                                                                                                                                                                                                                                                   |
| <b>Molecular formula</b>          | <b>C<sub>23</sub>H<sub>25</sub>ClN<sub>2</sub></b>                                                                                                                                                                                                                                                                                                                                                                                                                                                               |
| <b>Melting point (°C)</b>         | <b>112-114</b>                                                                                                                                                                                                                                                                                                                                                                                                                                                                                                   |
| <b>Boiling point (°C)</b>         | <b>526.2 at 760mmHg</b>                                                                                                                                                                                                                                                                                                                                                                                                                                                                                          |
| <b>Density (g/cm<sup>3</sup>)</b> | <b>1.131</b>                                                                                                                                                                                                                                                                                                                                                                                                                                                                                                     |
| <b>λ max (nm)</b>                 | <b>617</b>                                                                                                                                                                                                                                                                                                                                                                                                                                                                                                       |
| <b>Size (nm)</b>                  | <b>1.4*1.1*0.5</b>                                                                                                                                                                                                                                                                                                                                                                                                                                                                                               |

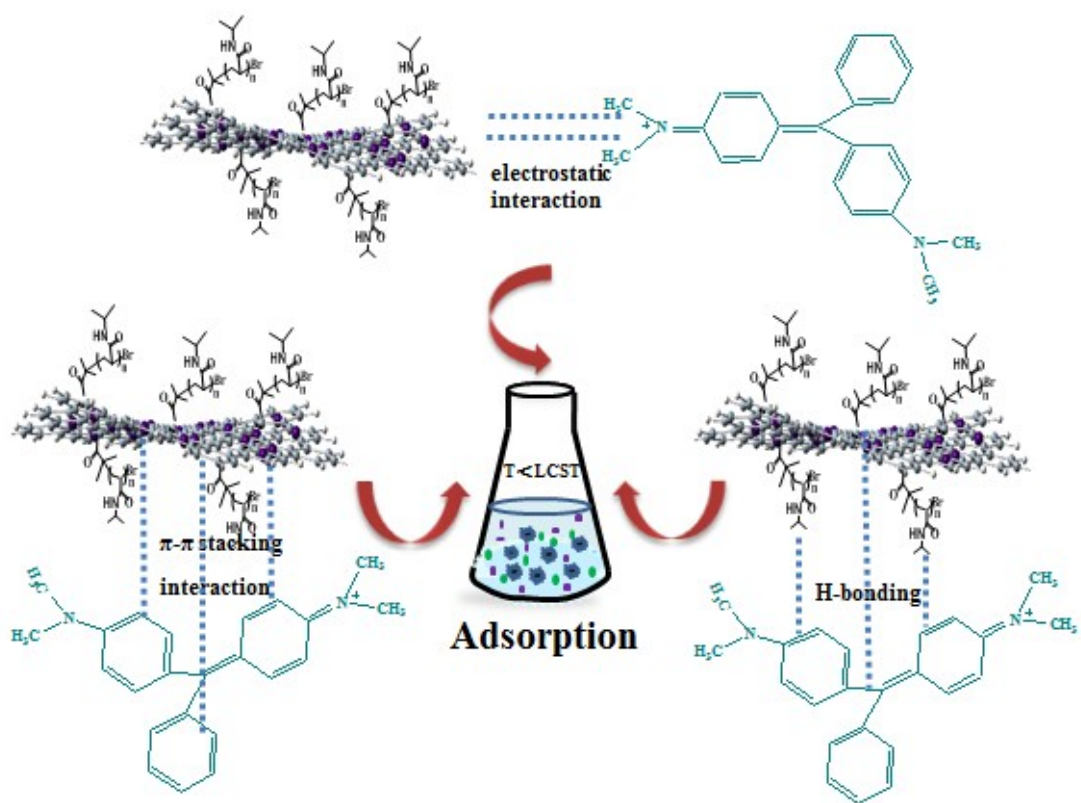

Scheme S1. The possible adsorption mechanisms for MG on MGO@PDA@PNIPAAM
